# Supplementary material for: African swine fever virus infection activates inflammatory responses through downregulation of the anti-inflammatory molecule C1QTNF3
Source: PubMed Central journal article supplement (PMC9598424; doi:10.3389/fimmu.2022.1002616), 2022-10-12
Supplement: DataSheet_1.pdf [file DataSheet_1.pdf]

## Supplementary Materials

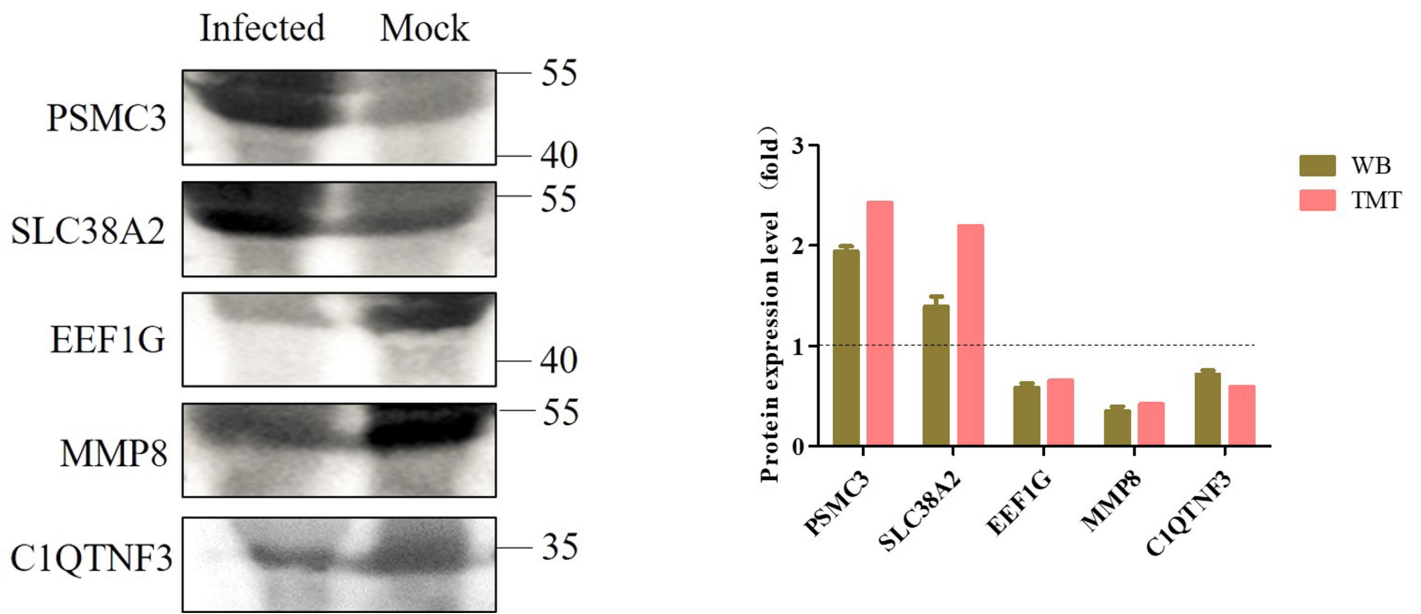

**Supplementary Figure 1.** Western blot analysis of the ASFV-infected and un-infected serum samples.

A

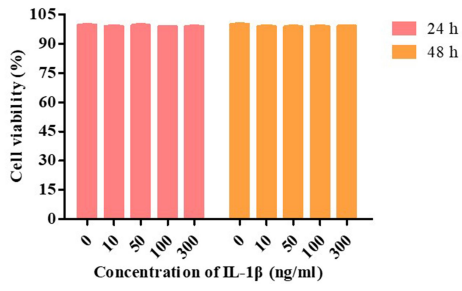

B

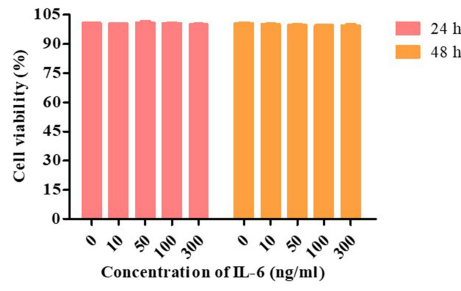

C

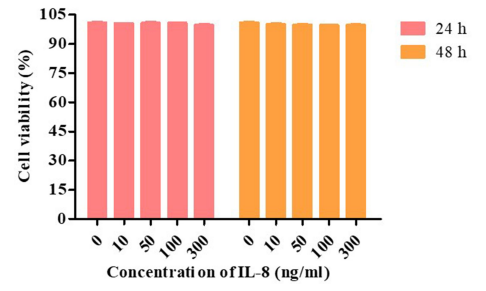

**Supplementary Figure 2.** Analysis of the cytotoxicity of porcine IL-1 $\beta$  (A), IL-6 (B), and IL-8 (C) protein to PAMs after 24 h and 48 h treatments by the CCK-8 assay.

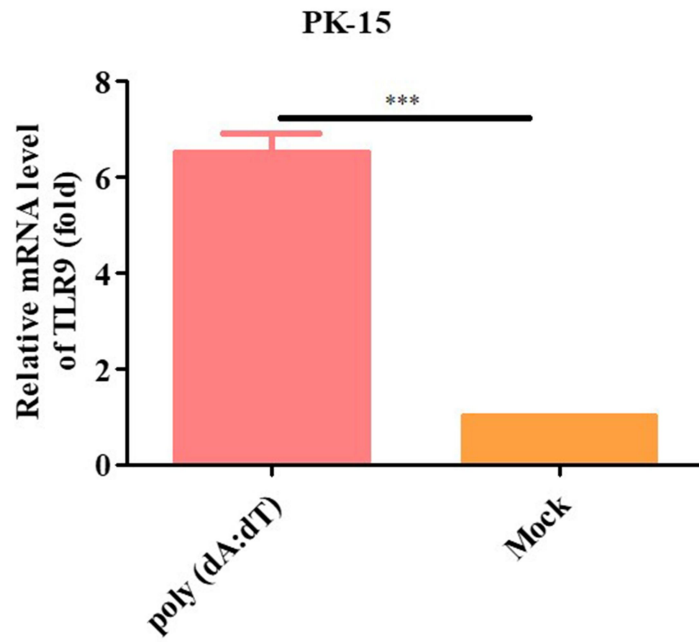

**Supplementary Figure 3.** The mRNA expression level of TLR9 in PK-15 cells following by poly (dA:dT) transfection.
